# Supplementary material for: Tunable three-dimensional ZrO2 photonic crystals replicated from single butterfly wing scales
Source: Royal Society of Chemistry journal article supplement (doi:10.1039/c1jm12189h), 2011-01-01
Supplement: c1jm12189h.pdf [file c1jm12189h.pdf]

## Supplementary Information

### Tunable three-dimensional ZrO<sub>2</sub> photonic crystals replicated from single butterfly wing scales

Yu Chen, Jiajun Gu,\* Di Zhang,\* Shenmin Zhu, Huilan Su, Xiaobin Hu, Chuanliang Feng, Wang  
Zhang, Qinglei Liu, and Andrew R. Parker

Email: [gujjajun@sjtu.edu.cn](mailto:gujjajun@sjtu.edu.cn); [zhangdi@sjtu.edu.cn](mailto:zhangdi@sjtu.edu.cn);

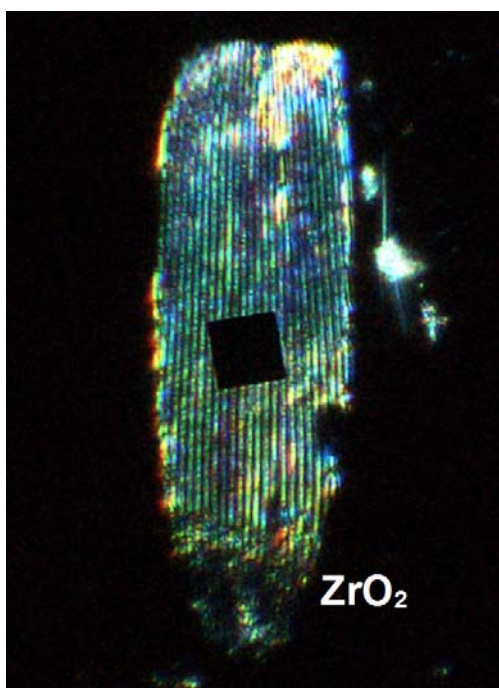

**Supp. Fig. 1** Optical microscope image of synthesized ZrO<sub>2</sub> single wing scale replica. The black square (~15 μm × 15 μm) shows where the reflectance spectra were acquired. ZrO<sub>2</sub> main-ridges are brighter than their adjacent areas (with no structures) and can be seen clearly under the optical microscope, which indicates the main-ridges with their fine structures are the most important functional light reflective units.
